# Supplementary material for: Reducing Adolescent Psychopathology in Socioeconomically Disadvantaged Children With a Preschool Intervention: A Randomized Controlled Trial
Source: Atypon-hosted journal article supplement (doi:10.1176/appi.ajp.2020.20030343), 2020-12-10
Supplement: appi.ajp.2020.20030343.ds001.pdf [file appi.ajp.2020.20030343.ds001.pdf]

**TABLE S1.** Baseline Demographics and Adjustment for Retained vs. Attrited Participants

|                                  | <u>Retained Participants</u> |         | <u>Attrited Participants</u> |         | Difference  |
|----------------------------------|------------------------------|---------|------------------------------|---------|-------------|
|                                  | (N = 281)                    |         | (N = 75)                     |         | Tests       |
|                                  | % of original group          |         | % of original group          |         | $\chi^2$    |
| <u>Intervention vs. Control</u>  |                              |         |                              |         | 6.60*       |
| Intervention Group               | 78%                          |         | 22%                          |         |             |
| Control Group                    | 88%                          |         | 12%                          |         |             |
| <u>Child Ethnicity/Race</u>      |                              |         |                              |         | 8.27*       |
| Ethnicity/Race: White            | 87%                          |         | 13%                          |         |             |
| Ethnicity/Race: Black            | 81%                          |         | 19%                          |         |             |
| Ethnicity/Race: Latinx           | 72%                          |         | 28%                          |         |             |
| <u>County</u>                    |                              |         |                              |         | 3.25        |
| County 1                         | 88%                          |         | 12%                          |         |             |
| County 2                         | 83%                          |         | 17%                          |         |             |
| County 3                         | 79%                          |         | 21%                          |         |             |
|                                  | Mean                         | (S.D.)  | Mean                         | (S.D.)  | df = 1, 354 |
| Family SES                       | 23.13                        | (10.10) | 21.27                        | (9.19)  | 0.61        |
| Family Risk Factors              | 0.32                         | (0.47)  | 0.35                         | (0.48)  | -0.52       |
| <u>Child Baseline Covariates</u> |                              |         |                              |         |             |
| Vocabulary                       | 35.28                        | (10.89) | 32.32                        | (10.96) | 1.92        |
| Observed Self-regulation         | 3.30                         | (0.55)  | 3.30                         | (0.58)  | -0.01       |
| Aggression                       | 2.91                         | (1.00)  | 2.86                         | (0.89)  | 0.39        |
| Hyperactivity-inattention        | 1.27                         | (0.66)  | 1.21                         | (0.58)  | 0.70        |
| Internalizing-withdrawn          | 1.98                         | (0.64)  | 1.95                         | (0.58)  | 0.37        |
| Social Competence                | 3.57                         | (0.79)  | 3.70                         | (0.83)  | -1.18       |

Note: The top rows compare attrition across categorical variables using chi-square tests; the bottom rows compare the means of continuous variables in the retained and attrited sample using t-tests. S.D. = standard deviation. Parent ratings of aggression and hyperactivity-inattention were pre-intervention covariates for teacher-rated conduct problems and hyperactivity-inattention, respectively. Parent ratings of internalizing-withdrawal and social competence were pre-intervention covariates for teacher rated emotional symptoms and peer problems, respectively.

\*  $p < .05$ .

**TABLE S2.** Description of Variables Included as Baseline Covariates in Analytic Models

| Source                       | Measure Description                                                                                                                                                                                                                                                                                                                                                                                                                                                                                                                                                                                                                                                                                  | Alpha           |
|------------------------------|------------------------------------------------------------------------------------------------------------------------------------------------------------------------------------------------------------------------------------------------------------------------------------------------------------------------------------------------------------------------------------------------------------------------------------------------------------------------------------------------------------------------------------------------------------------------------------------------------------------------------------------------------------------------------------------------------|-----------------|
| <u>Study Design Features</u> |                                                                                                                                                                                                                                                                                                                                                                                                                                                                                                                                                                                                                                                                                                      |                 |
| Design                       | <i>Cohort</i> : Participants were recruited over two successive years, creating two cohorts.                                                                                                                                                                                                                                                                                                                                                                                                                                                                                                                                                                                                         | NA              |
| Design                       | <i>County</i> : Head Start centers were in three Pennsylvanian counties including urban/suburban areas in the southeast and small towns/rural areas in central PA.                                                                                                                                                                                                                                                                                                                                                                                                                                                                                                                                   | NA              |
| <u>Child Characteristics</u> |                                                                                                                                                                                                                                                                                                                                                                                                                                                                                                                                                                                                                                                                                                      |                 |
| Parent                       | <i>Child sex and ethnicity/race</i> : Parents reported on child sex (male, female) and child ethnicity/race (White-non Latinx; Latinx; Black).                                                                                                                                                                                                                                                                                                                                                                                                                                                                                                                                                       | NA              |
| Parent                       | <i>Adverse childhood experiences (ACEs)</i> : At the initial interview, parents reported on child exposure to 9 events, each scored as present/absent: 1) any form of child abuse, 2) witnessing violence, 3) a separation that involved living apart from the primary caregiver, 4) excessive family mobility (3 or more family moves); 5) parent arrest; 6) parent special education; 7) parent grade retention; 8) parent depression (CES-D Questionnaire) dichotomized at the clinical cutoff score; and 9) frequent corporal punishment (5 times or more in the last week). Items were scored as a cumulative index using IRT; the top third of the sample was designated as high ACE exposure. | $\alpha = 0.55$ |
| Assessment                   | <i>Vocabulary</i> : Trained examiners administered the <i>Expressive One-Word Picture Vocabulary Test</i> (EOWPVT <sup>1</sup> ), a standardized measure of child vocabulary. Children gave the word that best described pictures they were shown.                                                                                                                                                                                                                                                                                                                                                                                                                                                   | $\alpha = .94$  |
| Observation                  | <i>Self-regulation</i> : After completing assessments, observers rated the child's task engagement, attentional focus, and persistence using an adapted 13-item version of the Leiter-R Assessor Report <sup>2</sup> .                                                                                                                                                                                                                                                                                                                                                                                                                                                                               | $\alpha = .93$  |
| Parent                       | <i>Baseline aggression</i> : Parents completed the <i>Teacher Observation of Child Adaptation-Revised (TOCA – R) Authority Acceptance</i> scale <sup>3</sup> , rating 7 aggressive behaviors (e.g., stubborn, yells, fights) using a 6-point scale.                                                                                                                                                                                                                                                                                                                                                                                                                                                  | $\alpha = .86$  |
| Parent                       | <i>Baseline hyperactivity-inattention</i> : Parents completed the ADHD Rating Scale <sup>4</sup> rating 14 items with a 4-point scale to describe attention problems, distractibility, overactivity, and impulsivity.                                                                                                                                                                                                                                                                                                                                                                                                                                                                                | $\alpha = .90$  |
| Parent                       | <i>Baseline emotional symptoms</i> : Parents completed a 5-item subscale <sup>5</sup> describing social withdrawal (avoids others) and internalizing problems (sad/unhappy).                                                                                                                                                                                                                                                                                                                                                                                                                                                                                                                         | $\alpha = .75$  |
| Parent                       | <i>Baseline peer problems</i> : Parents completed the 13-item <i>Social Competence Scale</i> <sup>6</sup> (Conduct Problems Prevention Research Group [CPPRG], 1995) to describe prosocial behaviors and peer relations.                                                                                                                                                                                                                                                                                                                                                                                                                                                                             | $\alpha = .87$  |

<sup>1</sup> Brownell, R. (2000). *Expressive One-Word Picture Vocabulary Test Manual*. Novato, CA: Academic Therapy Publications.

<sup>2</sup> Smith-Donald, R., Raver, C. C., Hayes, T., & Richardson, B. (2007). Preliminary construct and concurrent validity of the Preschool Self-Regulation Assessment (PSRA) for field-based research. *Early Childhood Research Quarterly*, 22, 173 – 187.

<sup>3</sup> Werthamer-Larsson, L., Kellam, S., & Wheeler, L. (1991). Effect of first-grade classroom environment on shy behavior, aggressive behavior, and concentration problems. *American Journal of Community Psychology*, 19, 585-602.

<sup>4</sup> DuPaul, G. (1991). Parent and teacher ratings of ADHD symptoms: Psychometric properties in a community-based sample. *Journal of Clinical Child Psychology*, 20, 245-253.

<sup>5</sup> Bierman, K. L., Domitrovich, C. E., Nix, R. L., Gest, S. D., Welsh, J. A., Greenberg, M. T., Blair, C., Nelson, K. E., & Gill, S. (2008). Promoting academic and social-emotional school readiness: The Head Start REDI Program. *Child Development*, 79, 1802-1817.

<sup>6</sup> Conduct Problems Prevention Research Group (1995). *Social Competence Scale Technical Report*. Available at: <http://www.fasttrackproject.org>

**TABLE S3.** Baseline Scores for Intervention and Control Groups on all Covariates

|                                   | <u>Control Group</u> |         | <u>Intervention Group</u> |         | <u>Difference Tests</u> |
|-----------------------------------|----------------------|---------|---------------------------|---------|-------------------------|
|                                   | (N = 164)            |         | (N = 192)                 |         | $\chi^2$                |
| <u>Data Collection Wave</u>       |                      |         |                           |         | 0.50                    |
| Cohort 1                          | 48%                  |         | 52%                       |         |                         |
| Cohort 2                          | 44%                  |         | 56%                       |         |                         |
| <u>County Site</u>                |                      |         |                           |         | 0.09                    |
| County 1                          | 45%                  |         | 55%                       |         |                         |
| County 2                          | 47%                  |         | 53%                       |         |                         |
| County 3                          | 46%                  |         | 54%                       |         |                         |
| <u>Child Sex</u>                  |                      |         |                           |         | 0.60                    |
| Female                            | 44%                  |         | 56%                       |         |                         |
| Male                              | 48%                  |         | 52%                       |         |                         |
| <u>Child Ethnicity/Race</u>       |                      |         |                           |         | 5.48                    |
| White                             | 44%                  |         | 56%                       |         |                         |
| Black                             | 56%                  |         | 44%                       |         |                         |
| Latinx                            | 38%                  |         | 62%                       |         |                         |
| <u>Adverse Child Experiences</u>  |                      |         |                           |         | 0.14                    |
| Less Exposure                     | 47%                  |         | 53%                       |         |                         |
| More Exposure                     | 45%                  |         | 55%                       |         |                         |
|                                   | Mean                 | (S.D.)  | Mean                      | (S.D.)  | T-test                  |
|                                   |                      |         |                           |         | df = 1, 354             |
| Vocabulary                        | 34.62                | (10.76) | 34.94                     | (11.10) | -0.24                   |
| Self-regulation                   | 3.35                 | (0.48)  | 3.26                      | (0.61)  | 1.45                    |
| Baseline Aggression               | 2.93                 | (.94)   | 2.88                      | (1.02)  | 0.45                    |
| Baseline Hyperactivity            | 1.28                 | (0.62)  | 1.24                      | (0.67)  | 0.49                    |
| Baseline Internalizing/withdrawal | 1.99                 | (0.60)  | 1.96                      | (0.65)  | 0.48                    |
| Baseline Social Competence        | 3.59                 | (.76)   | 3.60                      | (.84)   | 0.50                    |

Note: The top rows compare baseline values across categorical variables using chi-square tests; the bottom rows compare the means of baseline continuous variables in the intervention and control samples using t-tests. S.D. = standard deviation. No differences were statistically significant.

**TABLE S4.** HLM Tests of Intervention Effects with Covariate Estimates Displayed

| Predictors                 | Conduct Problems |        | Emotional<br>Symptoms |        | Hyperactivity-<br>Inattention |        | Peer Problems |        |
|----------------------------|------------------|--------|-----------------------|--------|-------------------------------|--------|---------------|--------|
|                            | Effect           | (SE)   | Effect                | (SE)   | Effect                        | (SE)   | Effect        | (SE)   |
| Intercept                  | 1.26             | (1.69) | 3.99*                 | (1.60) | 1.68                          | (2.02) | 3.19*         | (1.40) |
| Child age                  | -0.17            | (0.36) | -0.36                 | (0.34) | 0.54                          | (0.43) | -0.15         | (0.30) |
| Child ethnicity: Black     | 0.45             | (0.27) | -0.64*                | (0.25) | 0.44                          | (0.32) | -0.28         | (0.22) |
| Child ethnicity: Latinx    | 0.22             | (0.32) | -0.15                 | (0.32) | 0.19                          | (0.40) | -0.21         | (0.27) |
| Child sex                  | -0.36            | (0.23) | 0.60**                | (0.21) | -1.05**                       | (0.27) | -0.20         | (0.18) |
| County 1                   | 0.45             | (0.30) | 0.10                  | (0.27) | 0.91*                         | (0.38) | 0.13          | (0.25) |
| County 2                   | 0.46             | (0.29) | 0.24                  | (0.26) | 1.00**                        | (0.33) | 0.28          | (0.23) |
| Observed self-regulation   | -0.05            | (0.21) | -0.31                 | (0.20) | -0.65*                        | (0.26) | -0.15         | (0.18) |
| Adverse child experiences  | 0.60*            | (0.24) | 0.34                  | (0.22) | 0.44                          | (0.30) | 0.34          | (0.20) |
| Cohort                     | 0.13             | (0.21) | 0.19                  | (0.20) | 0.11                          | (0.26) | 0.20          | (0.18) |
| Baseline score for outcome | 0.26*            | (0.11) | -0.02                 | (0.15) | 0.68**                        | (0.21) | -0.14         | (0.12) |
| Time                       | -0.11            | (0.08) | 0.12                  | (0.09) | -0.10                         | (0.09) | 0.00          | (0.07) |
| Intervention               | 0.43*            | (0.21) | -0.53**               | (0.20) | -0.44                         | (0.27) | -0.33         | (0.18) |

Note: SE = standard error. \*\* $p < .01$ . \* $p < .05$ .

**TABLE S5.** Comparing Intervention and Control Group Youth Scoring at Clinical Risk Levels on the SDQ in Grade 7

| SDQ Problem Scale                | <u>SDQ Clinical Risk Category</u> |       |      |      |      | <u>Logistic Regressions</u> |          |                            |           |
|----------------------------------|-----------------------------------|-------|------|------|------|-----------------------------|----------|----------------------------|-----------|
|                                  |                                   |       |      |      |      | <u>Average vs. Other</u>    |          | <u>Very High vs. Other</u> |           |
|                                  |                                   |       |      |      |      | Average                     | Elevated | High                       | Very High |
| <u>Conduct Problems</u>          |                                   |       |      |      |      | 0.07                        | 1.08     | -0.51                      | -0.60     |
| Control Group                    | %                                 | 71%   | 8%   | 8%   | 14%  |                             |          |                            |           |
|                                  | (N)                               | (94)  | (10) | (10) | (18) |                             |          |                            |           |
| Intervention Group               | %                                 | 73%   | 10%  | 8%   | 10%  |                             |          |                            |           |
|                                  | (N)                               | (91)  | (12) | (10) | (12) |                             |          |                            |           |
| <u>Emotional Symptoms</u>        |                                   |       |      |      |      | 0.32                        | 1.37     | -0.38                      | -0.68     |
| Control                          | %                                 | 77%   | 12%  | 5%   | 6%   |                             |          |                            |           |
|                                  | (N)                               | (102) | (16) | (6)  | (8)  |                             |          |                            |           |
| Intervention                     | %                                 | 81%   | 10%  | 5%   | 5%   |                             |          |                            |           |
|                                  | (N)                               | (101) | (12) | (6)  | (6)  |                             |          |                            |           |
| <u>Hyperactivity-Inattention</u> |                                   |       |      |      |      | .34                         | 1.40     | -0.70                      | -0.50     |
| Control                          | %                                 | 68%   | 18%  | 5%   | 9%   |                             |          |                            |           |
|                                  | (N)                               | (90)  | (24) | (6)  | (12) |                             |          |                            |           |
| Intervention                     | %                                 | 74%   | 18%  | 2%   | 6%   |                             |          |                            |           |
|                                  | (N)                               | (92)  | (22) | (3)  | (8)  |                             |          |                            |           |
| <u>Peer Problems</u>             |                                   |       |      |      |      | -0.04                       | 0.96     | -0.91                      | -0.40     |
| Control                          | %                                 | 69%   | 18%  | 4%   | 8%   |                             |          |                            |           |
|                                  | (N)                               | (90)  | (24) | (5)  | (11) |                             |          |                            |           |
| Intervention                     | %                                 | 68%   | 25%  | 3%   | 4%   |                             |          |                            |           |
|                                  | (N)                               | (85)  | (31) | (4)  | (5)  |                             |          |                            |           |

Note: Numbers of participants in each cell are indicated in parentheses below the percentage. OR = Odds Ratio. \*  $p < .05$  \*\*  $p < .01$ .
